# Supplementary material for: Synthesis of Hyperbranched Flame Retardants with Varied Branched Chains’ Rigidity and Performance of Modified Epoxy Resins
Source: MDPI journal article supplement (doi:10.3390/polym15020449), 2023-01-14
Supplement: s1 [file s1]

## **Supporting information**

The supporting information included **9 Figures and 1 Table**

Number of Page S2–S9: Figure S1–S9.

Number of Page S9: Table S1.

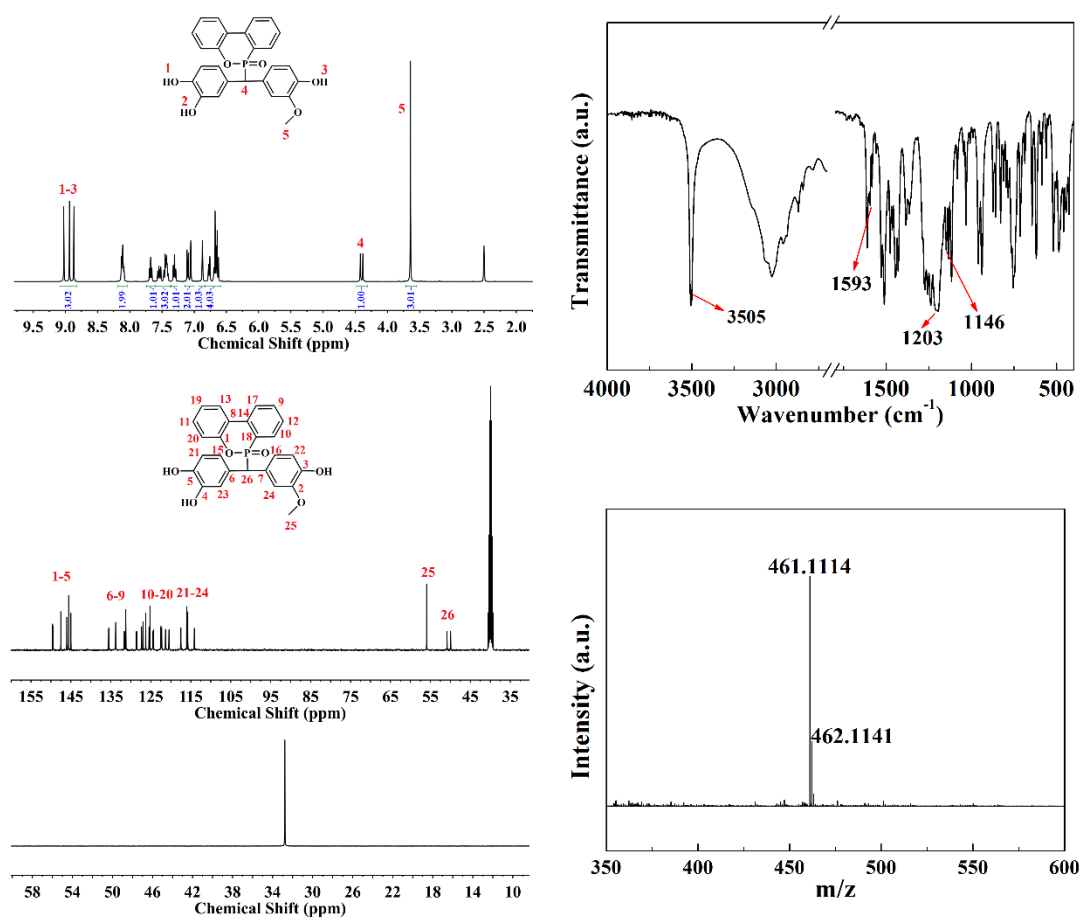

**Figure S1.** <sup>1</sup>H, <sup>13</sup>C and <sup>31</sup>P NMR spectra, FT-IR spectra and HR-MS spectrum of PDG

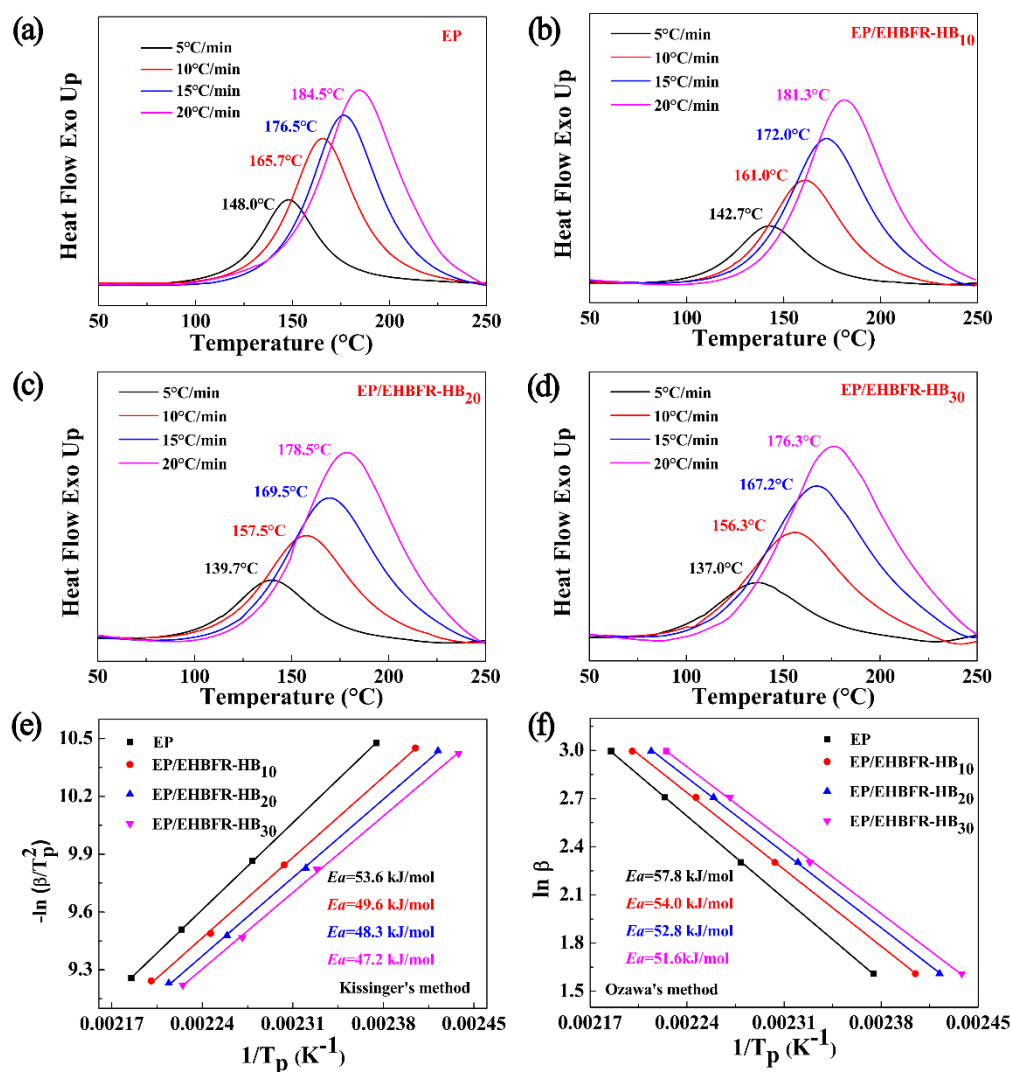

**Figure S2.** DSC curves of EP/ EHBFR-HB systems (a–d) at different heating rates, as well as plots generated following the Kissinger's (e) and Ozawa's (f) methods for determination of the activation energy of epoxy thermosets

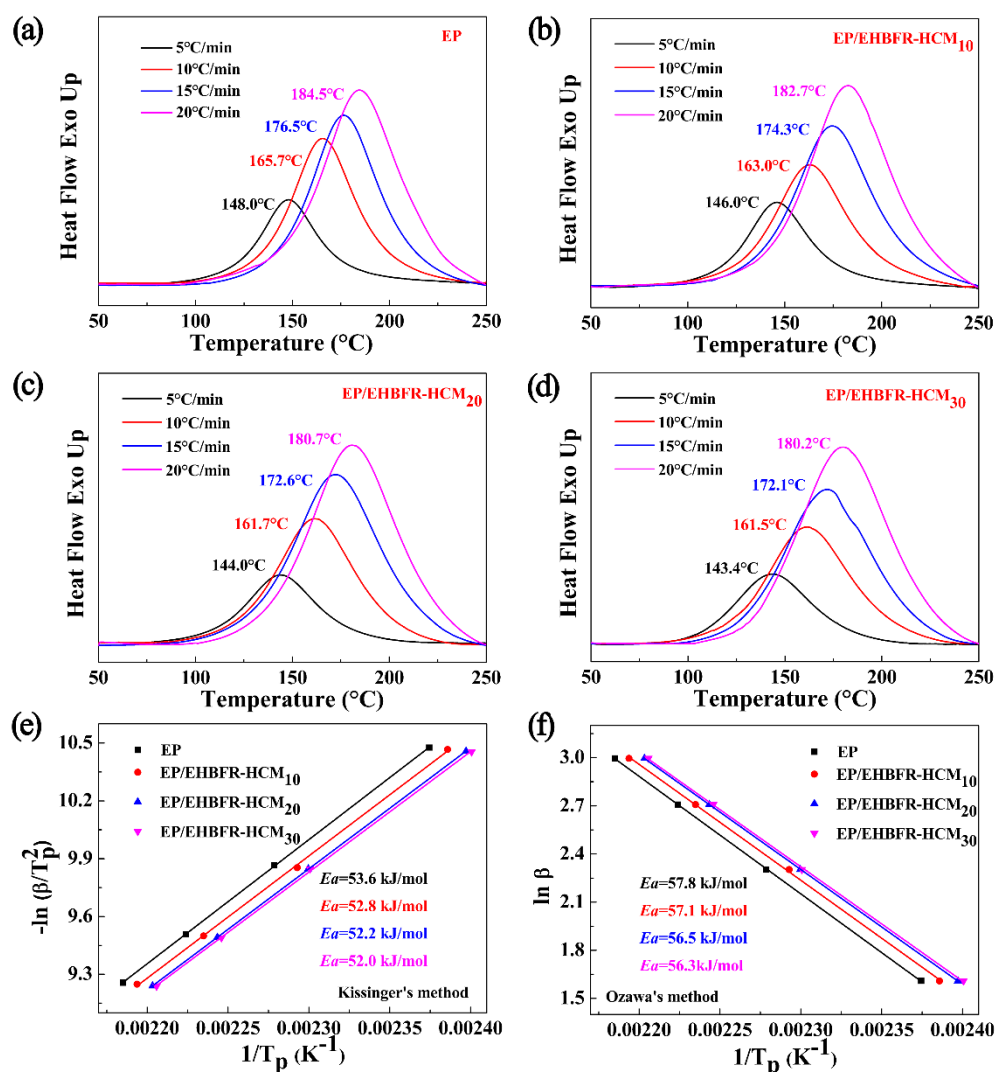

**Figure S3.** DSC curves of EP/ EHBFR-HCM systems (a–d) at different heating rates, as well as plots generated following the Kissinger's (e) and Ozawa's (f) methods for determination of the activation energy of epoxy thermosets

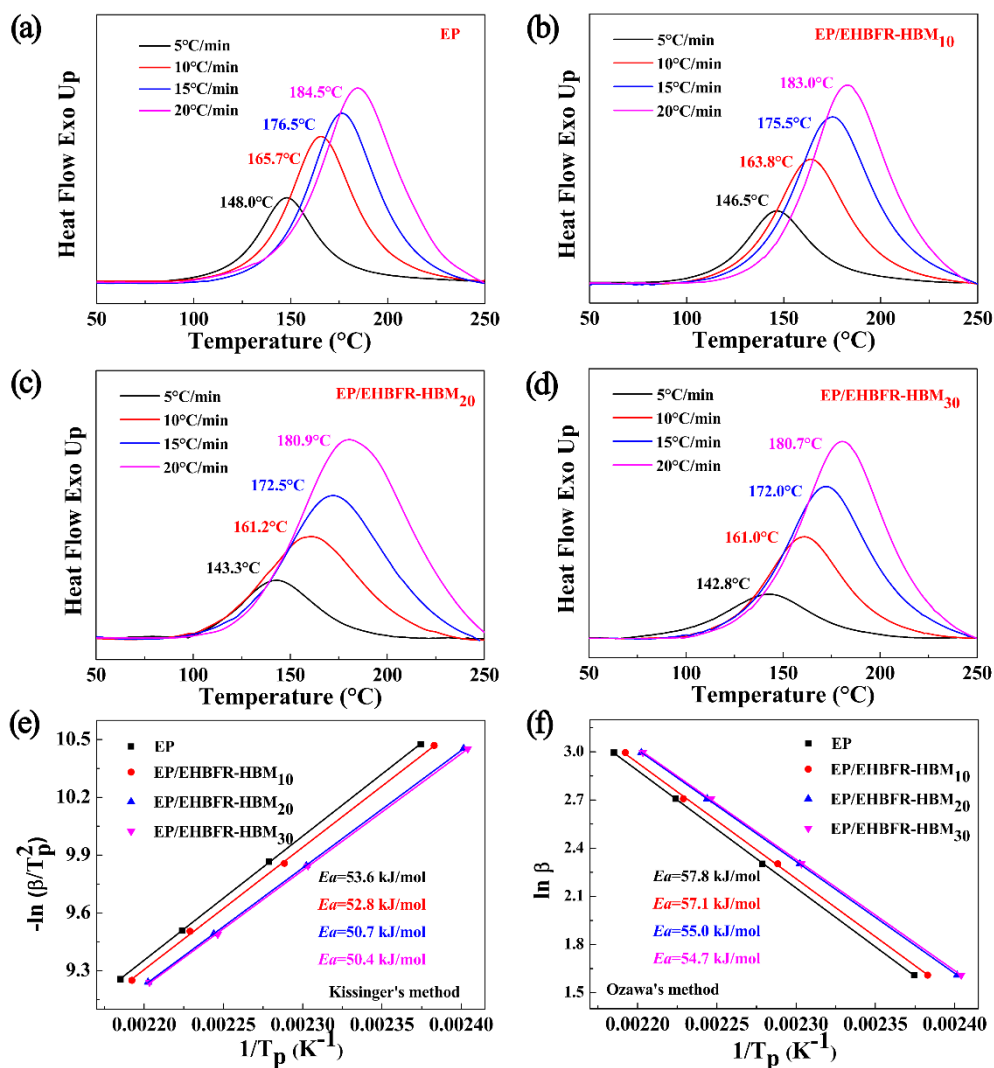

**Figure S4.** DSC curves of EP/ EHBFR-HBM systems (a–d) at different heating rates, as well as plots generated following the Kissinger's (e) and Ozawa's (f) methods for determination of the activation energy of epoxy thermosets.

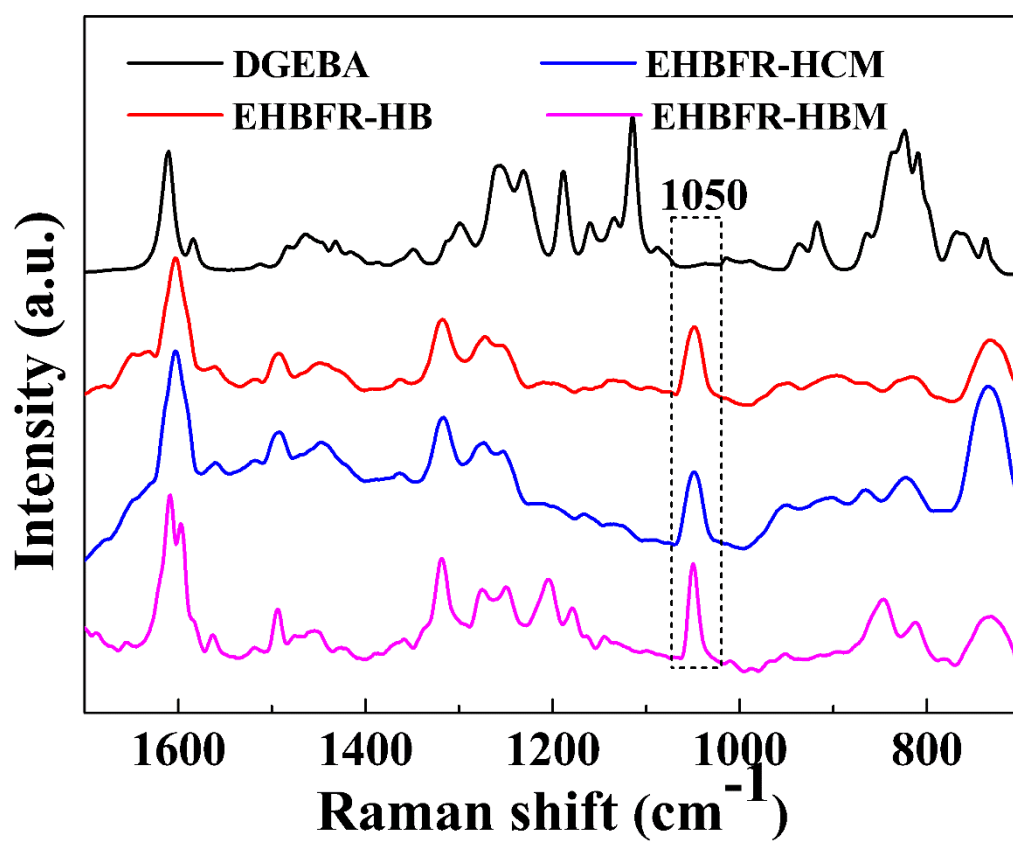

**Figure S5.** Raman spectra of EHBFR-HB, EHBFR-HCM, EHBFR-HBM, and pure DGEBA

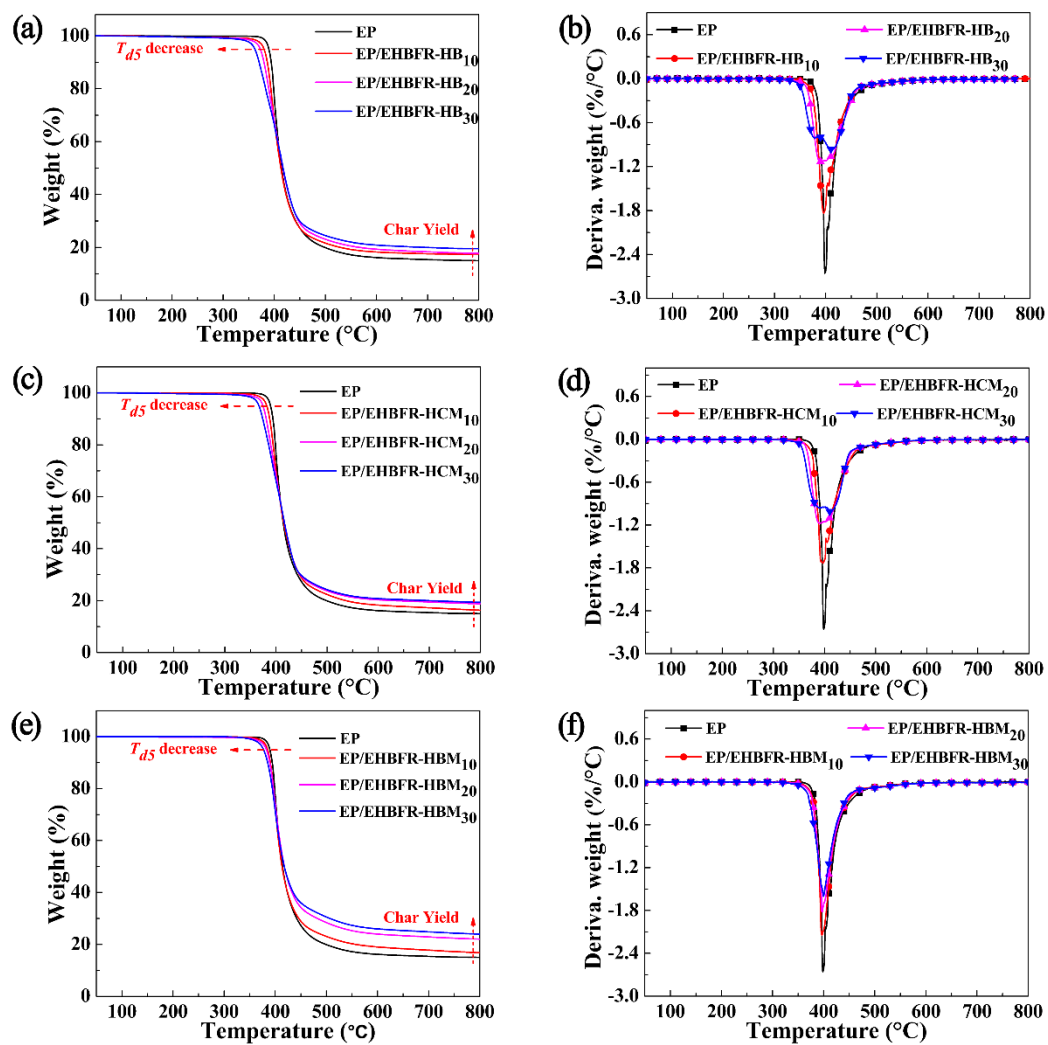

**Figure S6.** Non-isothermal TGA and DTG curves for cured EP/ EHBFR-HB (a,b), cured EP/ EHBFR-HCM (c,d), and cured EP/ EHBFR-HBM (e,f)

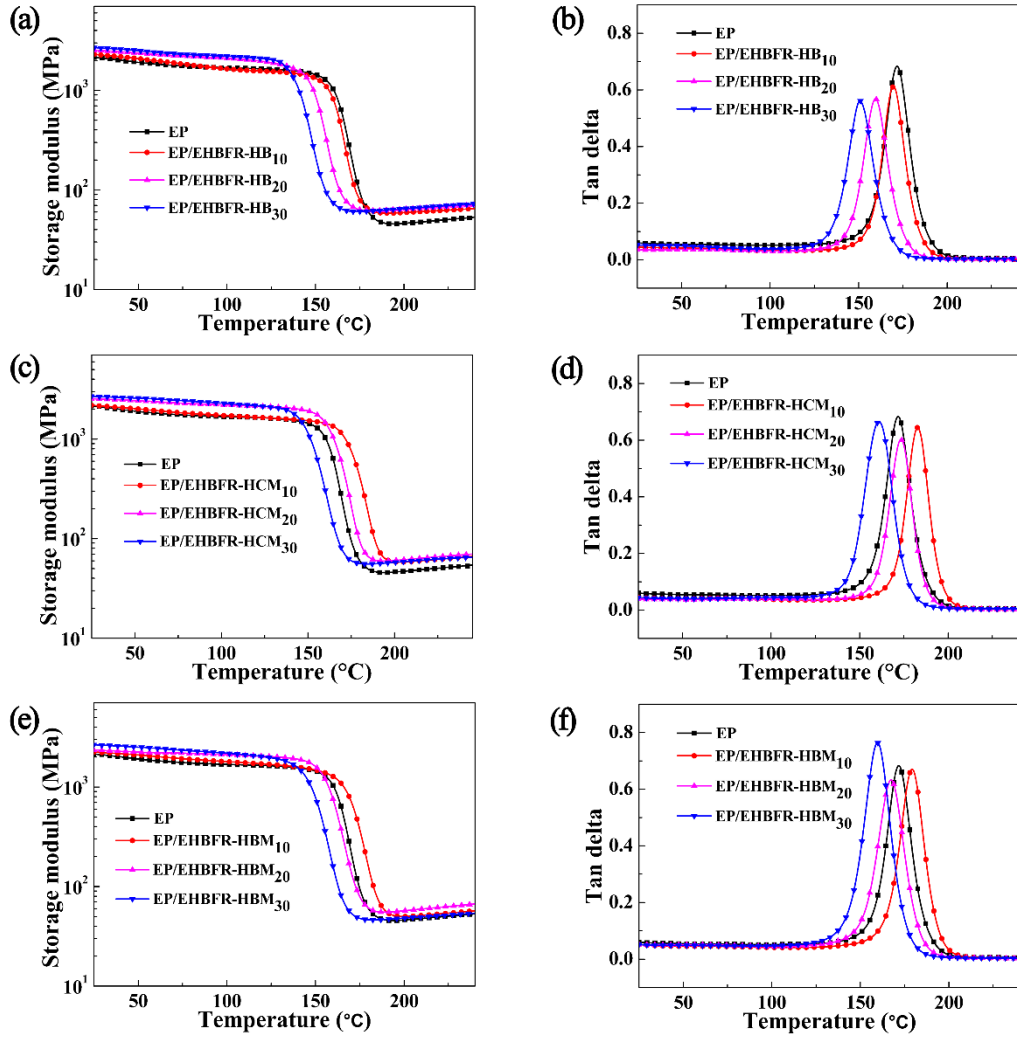

**Figure S7.** Variation of storage modulus and  $\tan\delta$  with temperature for cured EP/EHBFR-HB (a,b), cured EP/EHBFR-HCM (c,d), and cured EP/EHBFR-HBM (e,f)

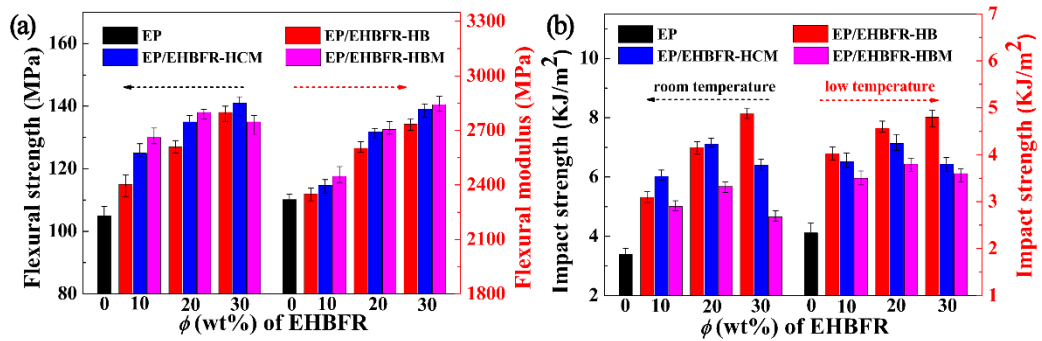

**Figure S8.** Flexural properties (a) and impact strength (b) for epoxy thermosets



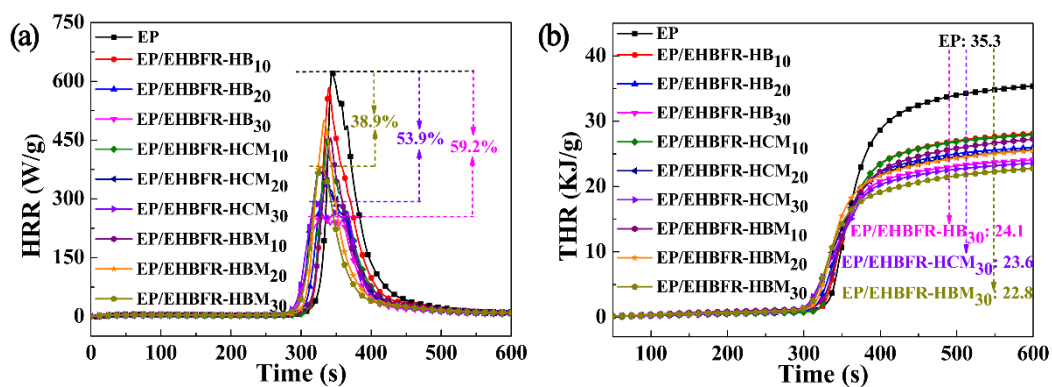

**Figure S9.** HRR (a) and THR (b) curves of epoxy thermostets

**Table S1.** UL-94 vertical burning and LOI results of epoxy thermostets.

| Samples              | LOI value<br>(vol%) | Vertical burning test |                    |          |              |
|----------------------|---------------------|-----------------------|--------------------|----------|--------------|
|                      |                     | After-flame time      |                    | Dripping | UL-94 rating |
|                      |                     | t <sub>1</sub> (s)    | t <sub>2</sub> (s) |          |              |
| EP                   | 23.6                | 74.6                  | —                  | Yes      | No rating    |
| EP/HB <sub>10</sub>  | 27.1                | 38.9                  | —                  | No       | No rating    |
| EP/HB <sub>20</sub>  | 28.8                | 7.0                   | 10.8               | No       | V-1          |
| EP/HB <sub>30</sub>  | 30.9                | 3.7                   | 5.3                | No       | V-0          |
| EP/HCM <sub>10</sub> | 27.2                | 35.4                  | —                  | No       | No rating    |
| EP/HCM <sub>20</sub> | 29.1                | 9.6                   | 7.8                | No       | V-1          |
| EP/HCM <sub>30</sub> | 30.5                | 3.4                   | 4.5                | No       | V-0          |
| EP/HBM <sub>10</sub> | 27.3                | 33.2                  | —                  | No       | No rating    |
| EP/HBM <sub>20</sub> | 29.3                | 9.6                   | 7.8                | No       | V-1          |
| EP/HBM <sub>30</sub> | 30.7                | 4.7                   | 2.5                | No       | V-0          |
